# Supplementary material for: Effect of the cation structure on cellulose dissolution in aqueous solutions of organic onium hydroxides
Source: Royal Society of Chemistry journal article supplement (doi:10.1039/d0cp03807e), 2020-01-01
Supplement: d0cp03807e1.pdf [file d0cp03807e1.pdf]

# Effect of cation structure on the cellulose dissolution in aqueous solutions of organic onium hydroxides

Akiko Tsurumaki, Miyu Tajima, Mitsuru Abe, Daiki Sato, and Hiroyuki Ohno\*

\*Corresponding author

Department of Biotechnology, Tokyo University of Agriculture and Technology, 2-24-16 Naka-cho, Koganei,

Tokyo, 184-8588 Japan; E-mail: ohnoh@cc.tuat.ac.jp; Tel: +81-42-388-7024; Fax: +81-42-388-7024.

## 1. Materials

Table S1-1. Assignment of NMR spectra of *N*-butylpyridinium hydroxide ([C<sub>4</sub>py]OH)

| Nw                               |                                  | Type of H                                        |
|----------------------------------|----------------------------------|--------------------------------------------------|
| 10                               | 200                              |                                                  |
| 8.85 (d, <i>J</i> = 6.0 Hz, 2H*) | 8.84 (d, <i>J</i> = 5.5 Hz, 2H*) | benzene ring                                     |
| 8.54 (t, <i>J</i> = 7.8 Hz, 1H*) | 8.53 (t, <i>J</i> = 7.8 Hz, 1H*) | benzene ring                                     |
| 8.07 (t, <i>J</i> = 6.6 Hz, 2H*) | 8.05 (t, <i>J</i> = 6.9 Hz, 2H*) | benzene ring                                     |
| 4.80 (s, 21H)                    | 4.79 (s, 401H)                   | H <sub>2</sub> O and OH                          |
| 4.61 (t, <i>J</i> = 7.6 Hz, 2H)  | 4.60 (t, <i>J</i> = 7.3 Hz, 2H)  | NCH <sub>2</sub>                                 |
| 2.04-1.96 (m, 2H)                | 1.95-2.03 (m, 2H)                | NCH <sub>2</sub> CH <sub>2</sub>                 |
| 1.41-1.32 (m, 2H)                | 1.30-1.40 (m, 2H)                | N(CH <sub>2</sub> ) <sub>2</sub> CH <sub>2</sub> |
| 0.94 (t, <i>J</i> = 7.3 Hz, 3H)  | 0.93 (t, <i>J</i> = 7.3 Hz, 3H)  | N(CH <sub>2</sub> ) <sub>3</sub> CH <sub>3</sub> |

\*The integral of chemical shift was less than 2H or 1H due to the decomposition of pyridinium ring in alkaline state. The decomposition was observed even diluted state (Nw=200).

Table S1-2. Assignment of NMR spectra of 1-butyl-3-methylimidazolium hydroxide ([C<sub>4</sub>mim]OH)

| Nw                                 |                                    |                                    |                                    | Type of H                                        |
|------------------------------------|------------------------------------|------------------------------------|------------------------------------|--------------------------------------------------|
| 10                                 | 15                                 | 20                                 | 25                                 |                                                  |
| 8.32 (d, <i>J</i> = 214.2 Hz, 1H*) | 8.53 (d, <i>J</i> = 189.6 Hz, 1H*) | 8.50 (d, <i>J</i> = 175.8 Hz, 1H*) | 8.52 (d, <i>J</i> = 163.2 Hz, 1H*) | NCHN                                             |
| 7.24-7.45 (m, 2H*)                 | 7.24-7.45 (m, 2H*)                 | 7.25-7.43 (m, 2H*)                 | 7.23-7.43 (m, 2H*)                 | NCHCHN                                           |
| 4.88 (s, 21H)                      | 4.88 (m, 31H)                      | 4.91 (s, 41H)                      | 4.89 (m, 51H)                      | H <sub>2</sub> O and OH                          |
| 4.11 (t, <i>J</i> = 7.2 Hz, 2H)    | 4.12 (t, <i>J</i> = 7.2 Hz, 2H)    | 4.11 (t, <i>J</i> = 7.2 Hz, 2H)    | 4.13 (t, <i>J</i> = 7.2 Hz, 2H)    | NCH <sub>2</sub>                                 |
| 3.80 (t, <i>J</i> = 29.2, 3H)      | 3.83 (t, <i>J</i> = 19.8 Hz, 3H)   | 3.82 (t, <i>J</i> = 20.3 Hz, 3H)   | 3.87 (t, <i>J</i> = 21.5 Hz, 3H)   | NCH <sub>3</sub>                                 |
| 1.70-1.75 (m, 2H)                  | 1.72-1.78 (m, 2H)                  | 1.71-1.77 (m, 2H)                  | 1.74-1.80 (m, 2H)                  | NCH <sub>2</sub> CH <sub>2</sub>                 |
| 1.19 (q, <i>J</i> = 7.4 Hz, 2H)    | 1.22 (q, <i>J</i> = 7.4 Hz, 2H)    | 1.21 (q, <i>J</i> = 7.4 Hz, 2H)    | 1.24 (q, <i>J</i> = 7.4 Hz, 2H)    | N(CH <sub>2</sub> ) <sub>2</sub> CH <sub>2</sub> |
| 0.71-0.81 (m, 3H)                  | 0.76-0.86 (m, 3H)                  | 0.75-0.85 (m, 3H)                  | 0.78-0.88 (m, 3H)                  | N(CH <sub>2</sub> ) <sub>3</sub> CH <sub>3</sub> |

\*The integral of chemical shift was less than 2H designating the de-protonation at the C(2) position of imidazolium ring.

Table S1-3. Assignment of NMR spectra of cholinium hydroxide ([Ch]OH)

| Nw                       |                          |                          |    | Type of H                        |
|--------------------------|--------------------------|--------------------------|----|----------------------------------|
| 10                       | 15                       | 20                       | 25 |                                  |
| 5.53-5.57 (m, 1H*)       | 5.36 (s, 1H)             | 5.22 (s, 1H)             | -  | CH <sub>2</sub> OH               |
| 5.43 (s, 21H)            | 5.24 (s, 31H)            | 5.10 (s, 41H)            | -  | H <sub>2</sub> O and OH          |
| 3.86 (t, J = 5.7 Hz, 2H) | 3.87-3.90 (m, 2H)        | 3.91-3.94 (m, 2H)        | -  | NCH <sub>2</sub> CH <sub>2</sub> |
| 3.26 (t, J = 5.7 Hz, 2H) | 3.29 (t, J = 5.7 Hz, 2H) | 3.32 (t, J = 5.7 Hz, 2H) | -  | NCH <sub>2</sub>                 |
| 3.07 (s, 9H)             | 3.08 (s, 9H)             | 3.11 (s, 9H)             | -  | NCH <sub>3</sub>                 |

\*The integral of chemical shift was less than 1H due to the de-protonation of the hydroxyl group of cholinium cation.

Table S1-4. Assignment of NMR spectra of *N*-butyl-*N*-methylmorpholinium hydroxide ([Mor<sub>14</sub>]OH) (500 MHz, D<sub>2</sub>O)

| Nw                       |                          |                          |                          | Type of H                                             |
|--------------------------|--------------------------|--------------------------|--------------------------|-------------------------------------------------------|
| 10                       | 15                       | 20                       | 25                       |                                                       |
| 5.06 (s, 21H)            | 5.02 (s, 31H)            | 4.98 (s, 41H)            | 4.95 (s, 51H)            | H <sub>2</sub> O and OH                               |
| 3.84-3.92 (m, 4H)        | 3.91 (t, J = 4.9 Hz, 4H) | 3.92 (t, J = 4.6 Hz, 4H) | 3.95 (t, J = 4.6 Hz, 4H) | CH <sub>2</sub> OCH <sub>2</sub>                      |
| 3.28-3.35 (m, 6H)        | 3.31-3.38 (m, 6H)        | 3.32-3.39 (m, 6H)        | 3.34-3.43 (m, 6H)        | NCH <sub>2</sub> and CH <sub>2</sub> NCH <sub>2</sub> |
| 3.03 (s, 3H)             | 3.06 (s, 3H)             | 3.07 (s, 3H)             | 3.09 (s, 3H)             | NCH <sub>3</sub>                                      |
| 1.59-1.63 (m, 2H)        | 1.63-1.66 (m, 2H)        | 1.64-1.67 (m, 2H)        | 1.67-1.70 (m, 2H)        | NCH <sub>2</sub> CH <sub>2</sub>                      |
| 1.22-1.26 (m, 2H)        | 1.26-1.30 (m, 2H)        | 1.27-1.31 (m, 2H)        | 1.29-1.34 (m, 2H)        | N(CH <sub>2</sub> ) <sub>2</sub> CH <sub>2</sub>      |
| 0.81 (t, J = 7.4 Hz, 3H) | 0.85 (t, J = 7.4 Hz, 3H) | 0.86 (t, J = 7.4 Hz, 3H) | 0.88 (t, J = 7.4 Hz, 3H) | N(CH <sub>2</sub> ) <sub>3</sub> CH <sub>3</sub>      |

Table S1-5. Assignment of NMR spectra of *N*-butyl-*N*-methylpiperidinium hydroxide ([Pip<sub>14</sub>]OH) (500 MHz, D<sub>2</sub>O)

| Nw                       |                          |                          |                          | Type of H                                                                                          |
|--------------------------|--------------------------|--------------------------|--------------------------|----------------------------------------------------------------------------------------------------|
| 10                       | 15                       | 20                       | 25                       |                                                                                                    |
| 5.04 (s, 21H)            | 5.03 (s, 31H)            | 4.99 (s, 41H)            | 4.97 (s, 51H)            | H <sub>2</sub> O and OH                                                                            |
| 3.12-3.18 (m, 6H)        | 3.14-3.19 (m, 6H)        | 3.17-3.22 (m, 6H)        | 3.19-3.24 (m, 6H)        | NCH <sub>2</sub> and CH <sub>2</sub> NCH <sub>2</sub>                                              |
| 2.86 (s, 3H)             | 2.88 (s, 3H)             | 2.90 (s, 3H)             | 2.91 (s, 3H)             | NCH <sub>3</sub>                                                                                   |
| 1.67-1.74 (broad, 4H)    | 1.71 (broad, 4H)         | 1.75 (broad, 4H)         | 1.76 (broad, 4H)         | CH <sub>2</sub> CH <sub>2</sub> NCH <sub>2</sub> CH <sub>2</sub>                                   |
| 1.44-1.58 (m, 4H)        | 1.45-1.60 (m, 4H)        | 1.47-1.64 (m, 4H)        | 1.49-1.66 (m, 4H)        | N(CH <sub>2</sub> ) <sub>2</sub> CH <sub>2</sub> (in ring)<br>and NCH <sub>2</sub> CH <sub>2</sub> |
| 1.18-1.25 (m, 2H)        | 1.20-1.27 (m, 2H)        | 1.22-1.30 (m, 2H)        | 1.25-1.32 (m, 2H)        | N(CH <sub>2</sub> ) <sub>2</sub> CH <sub>2</sub>                                                   |
| 0.80 (t, J = 7.4 Hz, 3H) | 0.82 (t, J = 7.4 Hz, 3H) | 0.85 (t, J = 7.4 Hz, 3H) | 0.86 (t, J = 7.4 Hz, 3H) | N(CH <sub>2</sub> ) <sub>3</sub> CH <sub>3</sub>                                                   |

Table S1-6. Assignment of NMR spectra of *N*-butyl-*N*-methylpyrrolidinium hydroxide ([Pyr<sub>14</sub>]OH) (500 MHz, D<sub>2</sub>O)

| Nw                       |                          |                          |                          | Type of H                                                        |
|--------------------------|--------------------------|--------------------------|--------------------------|------------------------------------------------------------------|
| 10                       | 15                       | 20                       | 25                       |                                                                  |
| 5.07 (s, 21H)            | 5.02 (s, 31H)            | 4.97 (s, 41H)            | 4.94 (s, 51H)            | H <sub>2</sub> O and OH                                          |
| 3.30-3.38 (m, 4H)        | 3.33-3.39 (m, 4H)        | 3.34-3.43 (m, 4H)        | 3.35-3.44 (m, 4H)        | CH <sub>2</sub> NCH <sub>2</sub>                                 |
| 3.15-3.18 (m, 2H)        | 3.17-3.21 (m, 2H)        | 3.20-3.24 (m, 2H)        | 3.21-3.26 (m, 2H)        | NCH <sub>2</sub>                                                 |
| 2.88 (s, 3H)             | 2.90 (s, 3H)             | 2.93 (s, 3H)             | 2.95 (s, 3H)             | NCH <sub>3</sub>                                                 |
| 2.04 (broad, 4H)         | 2.07 (broad, 4H)         | 2.10 (broad, 4H)         | 2.12 (broad, 4H)         | CH <sub>2</sub> CH <sub>2</sub> NCH <sub>2</sub> CH <sub>2</sub> |
| 1.57-1.62 (m, 2H)        | 1.61-1.65 (m, 2H)        | 1.63-1.69 (m, 2H)        | 1.65-1.73 (m, 2H)        | NCH <sub>2</sub> CH <sub>2</sub>                                 |
| 1.20-1.25 (m, 2H)        | 1.23-1.28 (m, 2H)        | 1.26-1.32 (m, 2H)        | 1.26-1.35 (m, 2H)        | N(CH <sub>2</sub> ) <sub>2</sub> CH <sub>2</sub>                 |
| 0.80 (t, J = 7.4 Hz, 3H) | 0.82 (t, J = 7.3 Hz, 3H) | 0.86 (t, J = 7.6 Hz, 3H) | 0.87 (t, J = 7.3 Hz, 3H) | N(CH <sub>2</sub> ) <sub>3</sub> CH <sub>3</sub>                 |

Table S1-7. Assignment of NMR spectra of tetrabutylammonium hydroxide ( $[N_{4444}]OH$ )

| Nw                          |                             |                             |                             | Type of H       |
|-----------------------------|-----------------------------|-----------------------------|-----------------------------|-----------------|
| 10                          | 15                          | 20                          | 25                          |                 |
| 4.82 (s, 21H)               | 4.82 (s, 31H)               | 4.82 (s, 41H)               | 4.84 (s, 51H)               | $H_2O$ and $OH$ |
| 3.18 (t, $J = 7.3$ Hz, 8H)  | 3.12 (t, $J = 8.1$ Hz, 8H)  | 3.10 (t, $J = 8.0$ Hz, 8H)  | 3.10 (t, $J = 8.5$ Hz, 8H)  | $NCH_2$         |
| 1.54 (br, 8H)               | 1.52 (br, 8H)               | 1.52 (br, 8H)               | 1.54 (br, 8H)               | $NCH_2CH_2$     |
| 1.33 (m, 8H)                | 1.30 (m, 8H)                | 1.29 (m, 8H)                | 1.29 (m, 8H)                | $N(CH_2)_2CH_2$ |
| 0.88 (t, $J = 7.3$ Hz, 12H) | 0.88 (t, $J = 7.3$ Hz, 12H) | 0.88 (t, $J = 7.2$ Hz, 12H) | 0.88 (t, $J = 7.3$ Hz, 12H) | $N(CH_2)_3CH_3$ |

Table S1-8. Assignment of NMR spectra of tetrabutylphosphonium hydroxide ( $[P_{4444}]OH$ )

| Nw                          |                             |                             |                             | Type of H       |
|-----------------------------|-----------------------------|-----------------------------|-----------------------------|-----------------|
| 10                          | 15                          | 20                          | 25                          |                 |
| 4.86 (s, 21H)               | 4.85 (s, 31H)               | 4.87 (s, 41H)               | 4.87 (s, 51H)               | $H_2O$ and $OH$ |
| 2.14-2.20 (m, 8H)           | 2.10-2.16 (m, 8H)           | 2.10-2.15 (m, 8H)           | 2.09-2.15 (m, 8H)           | $PCH_2$         |
| 1.34-1.50 (m, 16H)          | 1.36-1.47 (m, 16H)          | 1.39-1.56 (m, 16H)          | 1.35-1.50 (m, 16H)          | $PCH_2CH_2CH_2$ |
| 0.89 (t, $J = 6.9$ Hz, 12H) | 0.89 (t, $J = 7.1$ Hz, 12H) | 0.89 (t, $J = 7.2$ Hz, 12H) | 0.89 (t, $J = 7.4$ Hz, 12H) | $P(CH_2)_3CH_3$ |

Table S1-9. Assignment of NMR spectra of *N,N*-dibutylpyrrolidinium hydroxide ( $[Pyr_{44}]OH$ )

| Nw                         | Type of H           |
|----------------------------|---------------------|
| 10                         |                     |
| 4.93 (s, 21H)              | $H_2O$ and $OH$     |
| 3.39 (broad, 4H)           | $CH_2NCH_2$         |
| 3.09 (t, $J = 8.2$ Hz, 4H) | $NCH_2$             |
| 2.02 (broad, 4H)           | $CH_2CH_2NCH_2CH_2$ |
| 1.55-1.47 (m, 4H)          | $NCH_2CH_2$         |
| 1.23 (q, $J = 7.3$ Hz, 4H) | $N(CH_2)_2CH_2$     |
| 0.79 (t, $J = 7.3$ Hz, 6H) | $N(CH_2)_3CH_3$     |

Table S1-10. Assignment of NMR spectra of *N,N*-dibutylmorpholinium hydroxide ( $[Mor_{44}]OH$ )

| Nw                         | Type of H       |
|----------------------------|-----------------|
| 10                         |                 |
| 4.87 (s, 21H)              | $H_2O$ and $OH$ |
| 4.03 (t, $J = 4.6$ Hz, 4H) | $CH_2OCH_2$     |
| 3.49 (t, $J = 5.0$ Hz, 4H) | $CH_2NCH_2$     |
| 3.40-3.44 (m, 4H)          | $NCH_2$         |
| 1.65-1.73 (m, 4H)          | $NCH_2CH_2$     |
| 1.44-1.34 (m, 4H)          | $N(CH_2)_2CH_2$ |
| 0.95 (t, $J = 7.3$ Hz, 6H) | $N(CH_2)_3CH_3$ |

## 2. Methods

### 2.1 Kamlet-Taft parameter calculation

Three solutions having 30.0 mL of dehydrated methanol and 0.03 g of each dye were prepared. 0.075 mL of either dye<sub>NN</sub> and dye<sub>4N</sub> solution or 0.15mL of dye<sub>Rei</sub> solution was separately transferred to an empty vial and dried under vacuum at 60 °C for 6 h. To these vials, 0.3mL of the chloride solutions were added and stirred gently. The sample solutions were placed in a quartz cell with a light path length of 0.1 mm and their UV-vis spectra were recorded. The Kamlet-Taft parameters were calculated according to the following equations (Equation (1) – (4)):

$$E_T(30) = 0.9986(28592 / \lambda_{\max(\text{Rei})}) - 8.6878 \dots (1)$$

$$\pi^* = 0.314(27.52 - \nu_{\text{NN}}) \dots (2)$$

$$\alpha = 0.0649 E_T(30) - 2.03 - 0.72\pi^* \dots (3)$$

$$\theta = (1.035\nu_{\text{NN}} + 2.64 - \nu_{4\text{N}}) / 2.80 \dots (4)$$

where,  $\lambda_{\max(\text{dye})}$  is the maximum absorption wavelength of the dye and  $\nu_{\text{dye}}$  is given as  $1 / (\lambda_{\max(\text{dye})} \times 10^{-4})$ .

### 3. Results

Table S2. Viscosity of OHAS with different  $Nw$  at 25 °C.

| Type of OHAS         | Viscosity / cP  |           |           |           |
|----------------------|-----------------|-----------|-----------|-----------|
|                      | $Nw^a=10$       | $Nw^a=15$ | $Nw^a=20$ | $Nw^a=25$ |
| [Ch]                 | .. <sup>b</sup> | 2.43      | 1.35      | 0.79      |
| [Mor <sub>14</sub> ] | 9.61            | 4.80      | 2.93      | 1.98      |
| [Pip <sub>14</sub> ] | 6.60            | 6.20      | 3.18      | 2.07      |
| [Pyr <sub>14</sub> ] | 7.04            | 4.24      | 2.27      | 2.09      |
| [N <sub>4444</sub> ] | N.A.            | N.A.      | N.A.      | N.A.      |
| [P <sub>4444</sub> ] | 12.6            | 5.36      | 4.66      | 4.95      |

<sup>a</sup> Ratio of H<sub>2</sub>O/OH (mol/mol), <sup>b</sup> not evaluated due to the decomposition of cation structures

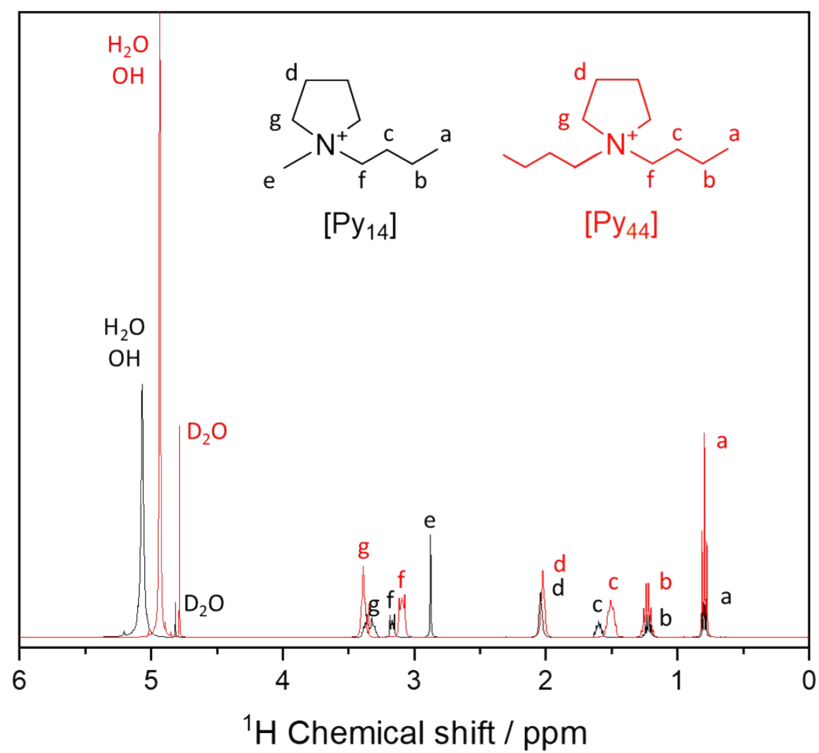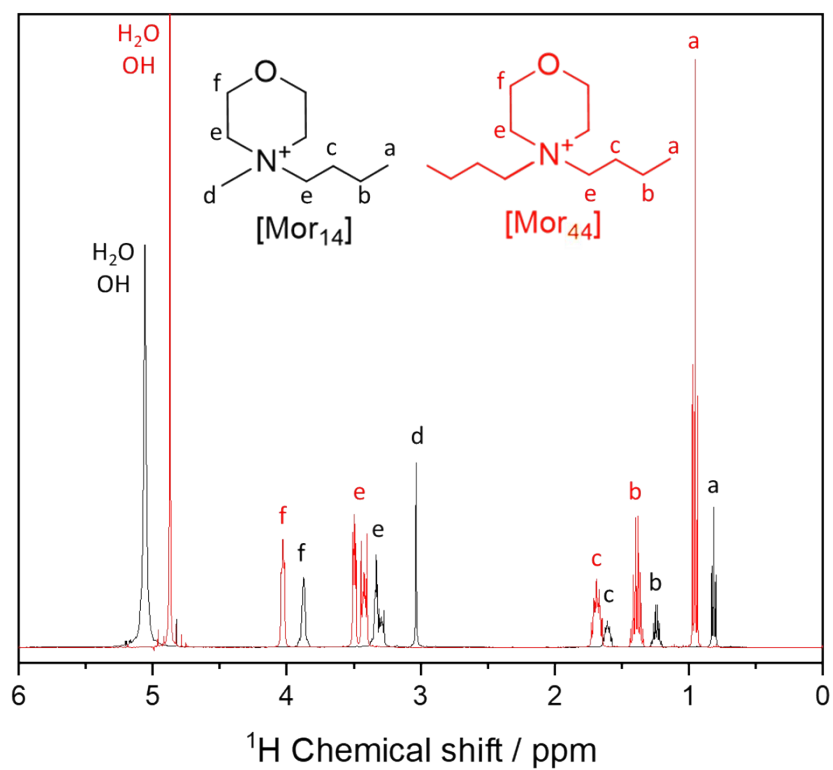

Figure S1. <sup>1</sup>H NMR spectra of [Py<sub>14</sub>]<sup>+</sup>OH, [Py<sub>44</sub>]<sup>+</sup>OH, [Mor<sub>14</sub>]<sup>+</sup>OH, and [Mor<sub>44</sub>]<sup>+</sup>OH.
